# Supplementary material for: Solvent effects on modulus of poly(propylene oxide)-based organogels as measured by cavitation rheology
Source: Royal Society of Chemistry journal article supplement (doi:10.1039/c6sm00431h), 2016-01-01
Supplement: c6sm00431h1.pdf [file c6sm00431h1.pdf]

**Supporting information for**

**Solvent Effects on Modulus of Poly(propylene oxide) Based**

**Organogels as Measured by Cavitation Rheology**

Kyle C. Bentz,<sup>a</sup> Susan E. Walley,<sup>b</sup> and Daniel A. Savin<sup>\*a</sup>

a. George & Josephine Butler Polymer Research Laboratory, Center for Macromolecular Science & Engineering, Department of Chemistry, University of Florida, Gainesville, FL, 32611.

b. School of Polymers and High Performance Materials, University of Southern Mississippi, Hattiesburg, MS 39406.

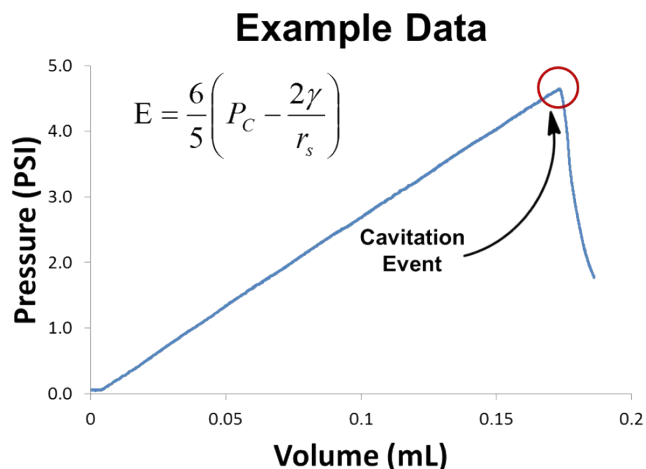

**Figure S1.** Example data for typical cavitation experiment. Critical pressure,  $P_c$ , is given as the maximum in the pressure vs. volume curve.

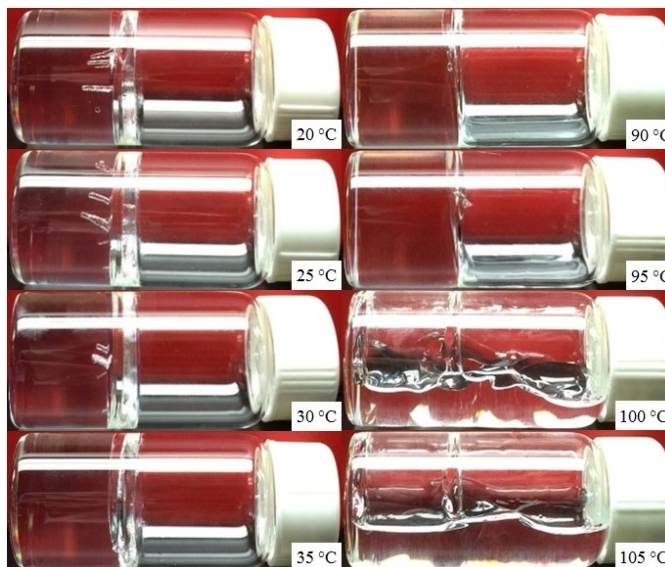

**Figure S2.** Determination of the sol/gel transition temperature for PPO-2000 organogels in toluene. At 100 °C the gel was incapable of withstanding gravitational stress and failed; at 105 °C the gelator was soluble and the system was a low viscosity fluid. After cooling to room temperature the gel was reformed. Note the punctures in the gel at 20 °C left behind from cavitation testing. Upon heating these punctures begin to heal, with full healing realized at 35 °C.

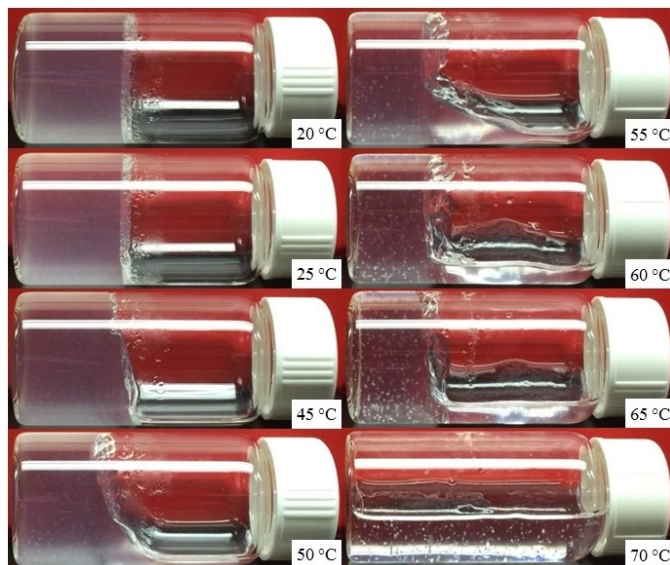

**Figure S3.** Determination of the sol/gel transition temperature for PPO-2000 organogels in ethyl acetate. Weakening of the gel occurs near 45 °C with a transition to a sol occurring until full disruption of the gel network at 70 °C. Note the increasing clarity of the gel with increasing temperature.

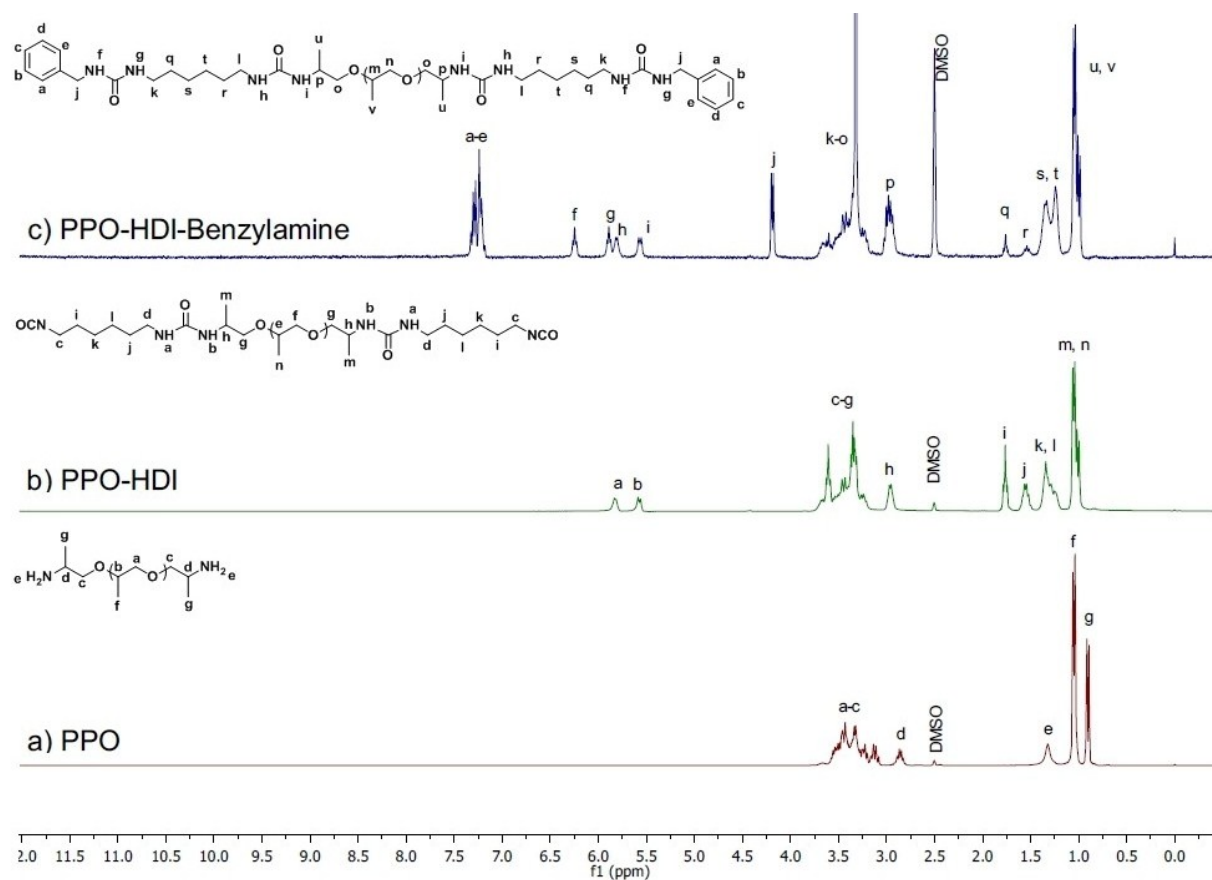

**Figure S4.**  $^1\text{H}$  NMR spectra of a) unmodified PPO-400 [amine terminated poly(propylene oxide) (Jeffamine D-400)], b) PPO-400 modified with hexamethylene diisocyanate, c) PPO-400 modified with hexamethylene diisocyanate and subsequent reaction with benzylamine. Spectra collected in  $\text{d}_6\text{DMSO}$ .

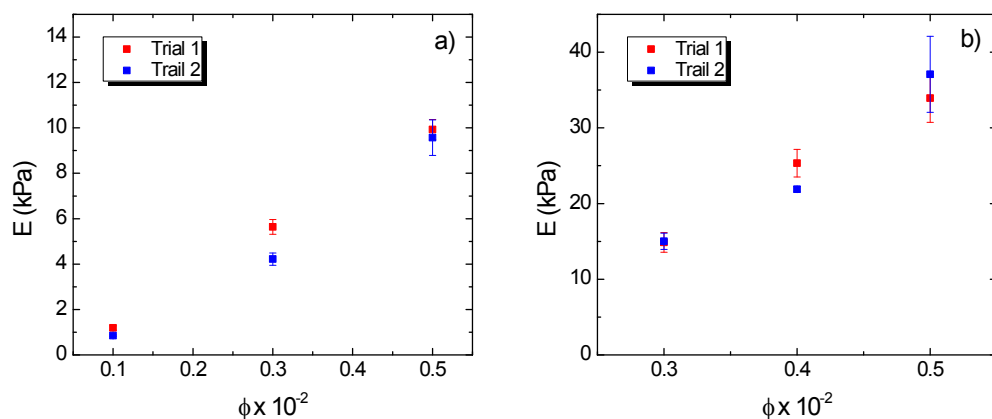

**Figure S5.** Representative examples of data reproducibility: a) PPO-2000 gels in toluene, octylamine end cap; b) PPO-2000 gels in carbon tetrachloride, butylamine end cap.

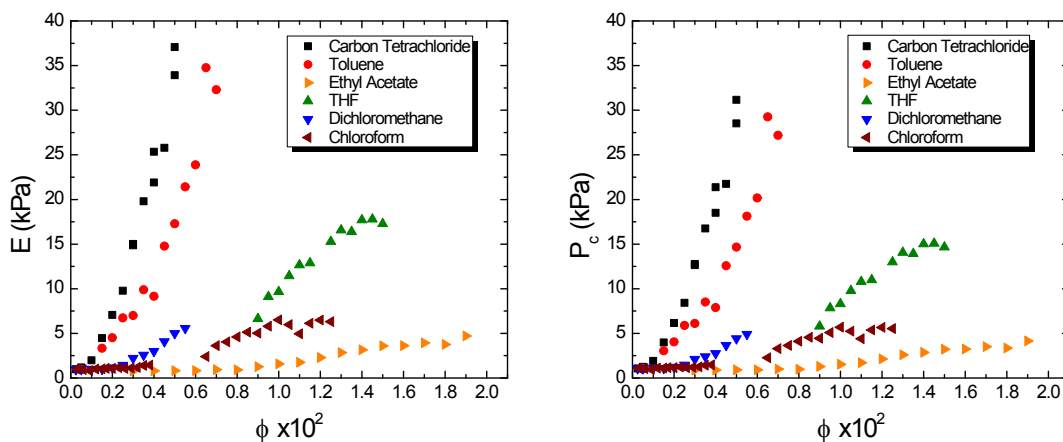

**Figure S6.** Moduli versus mass fraction (left) and critical pressure versus mass fraction (right) for PPO-2000 gels.

**Table S1.** Sol-gel transition temperatures for all gels.

| Solvent              | Sol-Gel Transition temperature (°C) |          |          |
|----------------------|-------------------------------------|----------|----------|
|                      | PPO-400                             | PPO-2000 | PPO-4000 |
| THF                  | >65                                 | 60       | 41       |
| Carbon Tetrachloride |                                     | 65       | 71       |
| Dichloromethane      | >41                                 | 40       | >41      |
| Toluene              | >110                                | 100      | >110     |
| Ethyl Acetate        |                                     | 70       | >77      |
| Chloroform           | >61                                 | 55       | >61      |

**Table S2.** Qualitative description of gels formed in this study. ‘Clear’ denotes gels that were perfectly transparent. ‘Hazy’ denotes gels that were very slightly cloudy to the eye and began to display characteristics of forming phase separated gels. ‘Phase’ denotes gels that were fully phase separated and formed fully cloudy and poorly solvated gels.

| Solvent              | Phase Behavior                                                                    |          |          |
|----------------------|-----------------------------------------------------------------------------------|----------|----------|
|                      | PPO-400                                                                           | PPO-2000 | PPO-4000 |
| THF                  | Phase                                                                             | Clear    | Clear    |
| Carbon Tetrachloride |  | Clear    | Hazy     |
| Dichloromethane      | Phase                                                                             | Clear    | Clear    |
| Toluene              | Phase                                                                             | Clear    | Clear    |
| Ethyl Acetate        |  | Hazy     | Hazy     |
| Chloroform           | Phase                                                                             | Clear    | Clear    |
